# Supplementary material
Source: publisher figshare collection journal article supplement (https://karger.figshare.com/articles/dataset/_/28503434)
Supplement: Supplementary file 1 [file 1]

**The epidemiological trends and prediction of brain and central nervous system cancer incidence and** **mortality, 1992-2021: Age-period-cohort analysis**

Yu Li1, Kai Zhao1*

1 Department of Neurosurgery, Tongji Hospital, Tongji Medical College, Huazhong University of Science and Technology, Wuhan, 430030, PR China.

*Corresponding Author: Kai Zhao, E-mail: zhaokai@tjh.tjmu.edu.cn

This file includes legends for **Supplemental Tables 1-4** and **Supplemental Figures 1-5**.

**Supplemental Table 1.** Age-standardized incidence rate, change in cases, EAPC, and AAPC of brain and central nervous system cancer from 1992 to 2021 by countries.

**Supplemental Table 2.** Age-standardized mortality rate, change in cases, EAPC, and AAPC of brain and central nervous system cancer from 1992 to 2021 by countries.

**Supplemental Table 3.** Incidence cases and age-standardised incidence rate due to brain and CNS cancer in 1992 and 2021, and its temporal trends, by SDI categories and GBD regions.

**Supplemental Table 4.** Death cases and age-standardised mortality rate due to brain and CNS cancer in 1992 and 2021, and its temporal trends, by SDI categories and GBD regions.


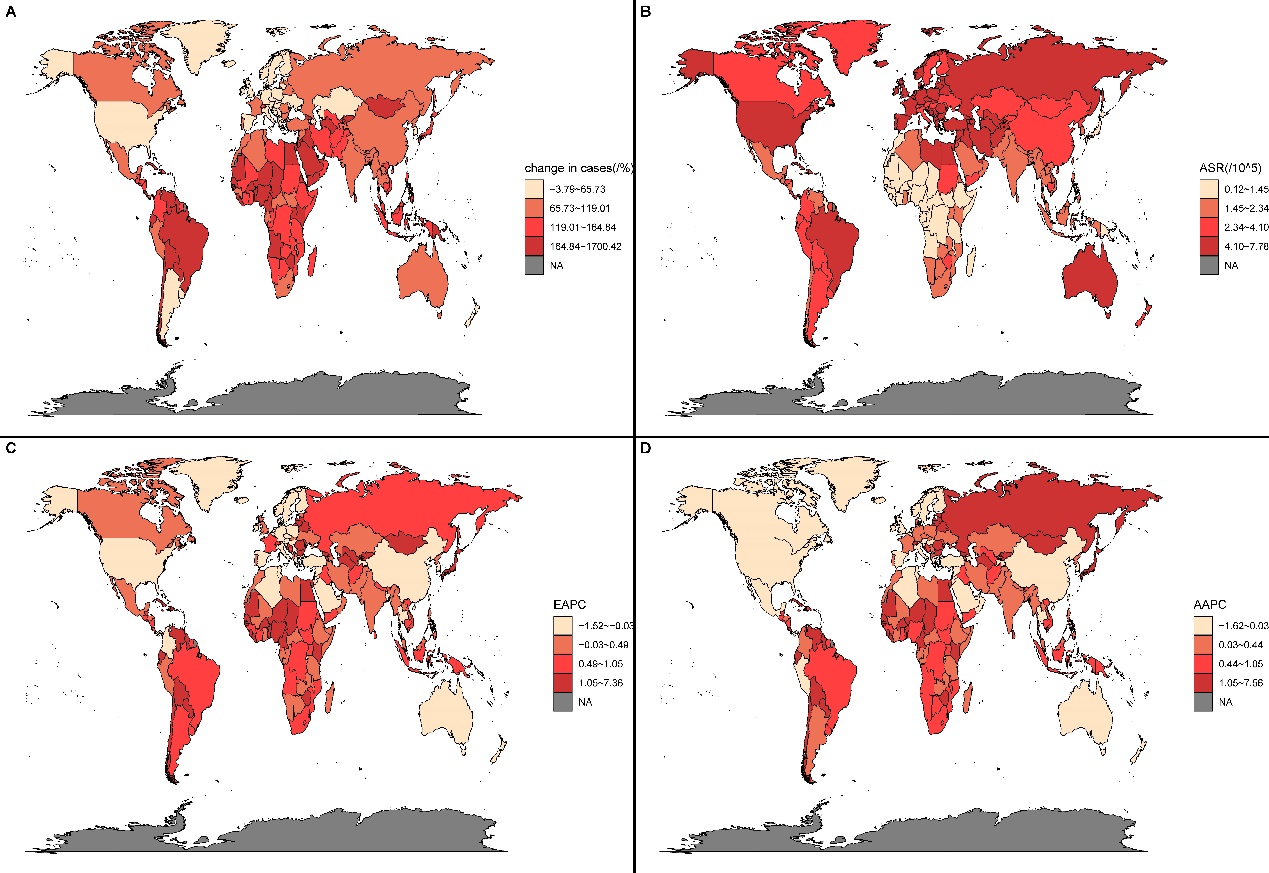
 **Supplemental** **Fig. 1.** Mortality analysis of brain and central nervous system cancer in 204 countries and territories using multiple metrics. (A) Change in cases from 1992 to 2021; (B) Age-standardized rate in 2021; (C) Estimated annual percentage change (EAPC) from 1992 to 2021; (D) Average annual percentage change (AAPC) from1992 to 2021.


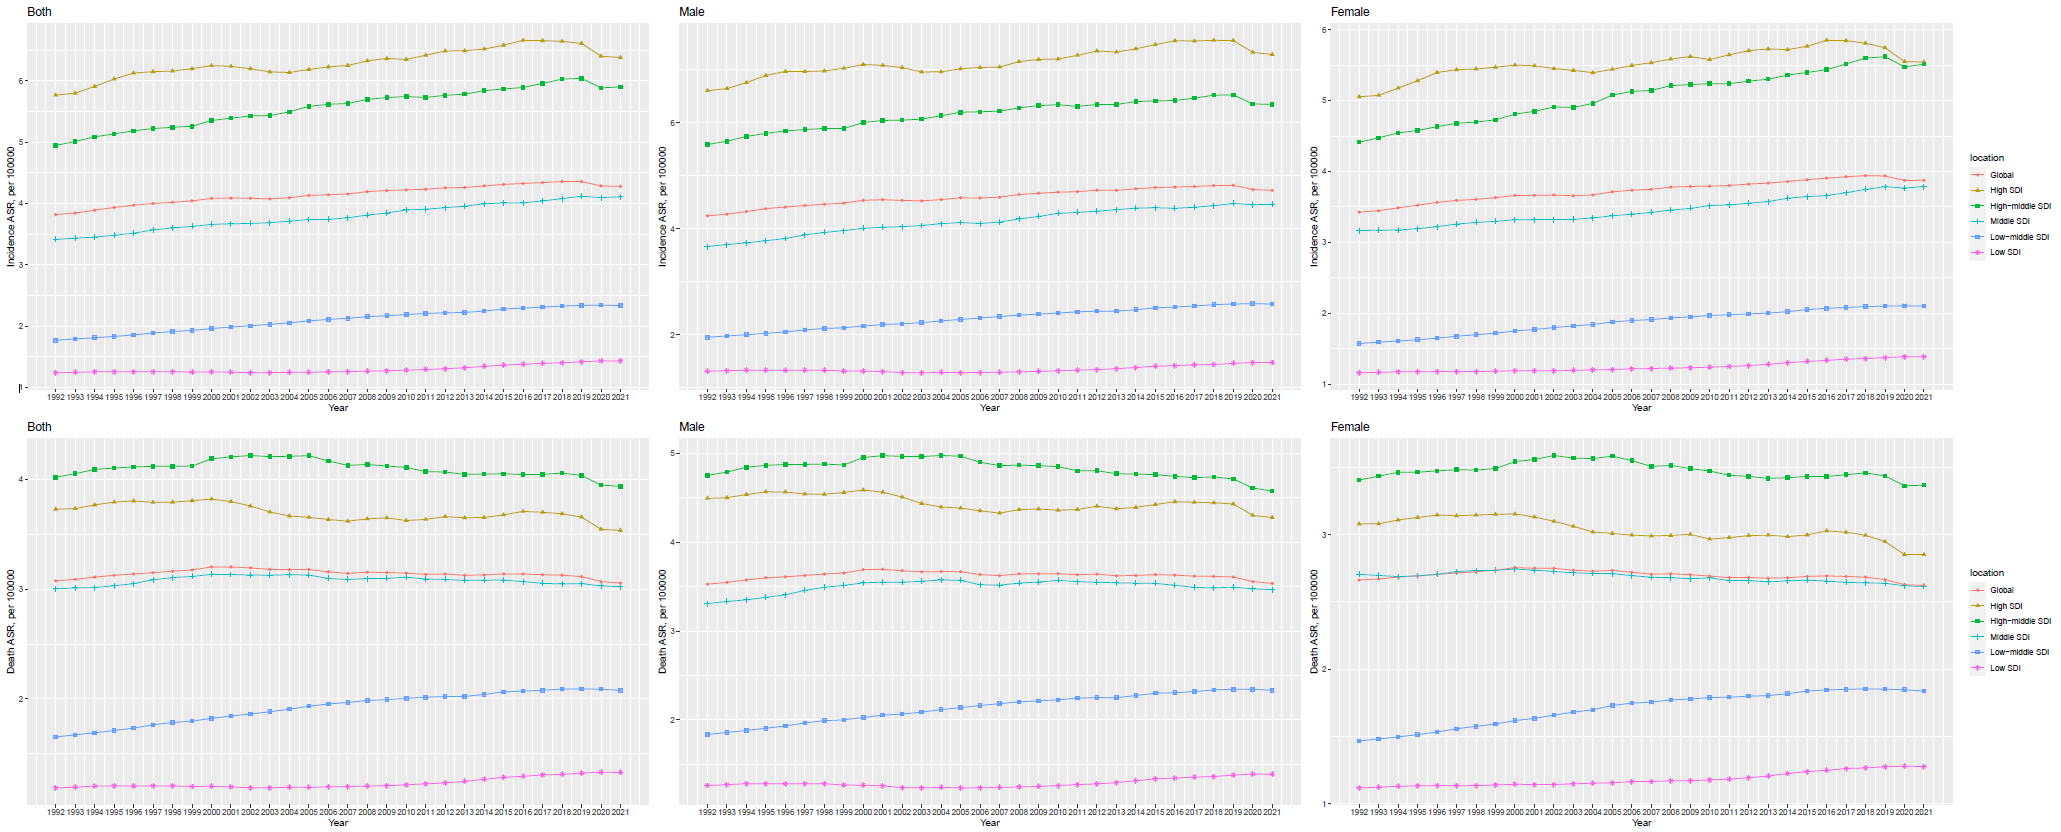
 **Supplemental** **Fig. 2.** Temporal trends from 1992-2021 globally and among different sociodemographic index regions for both, male, and female.


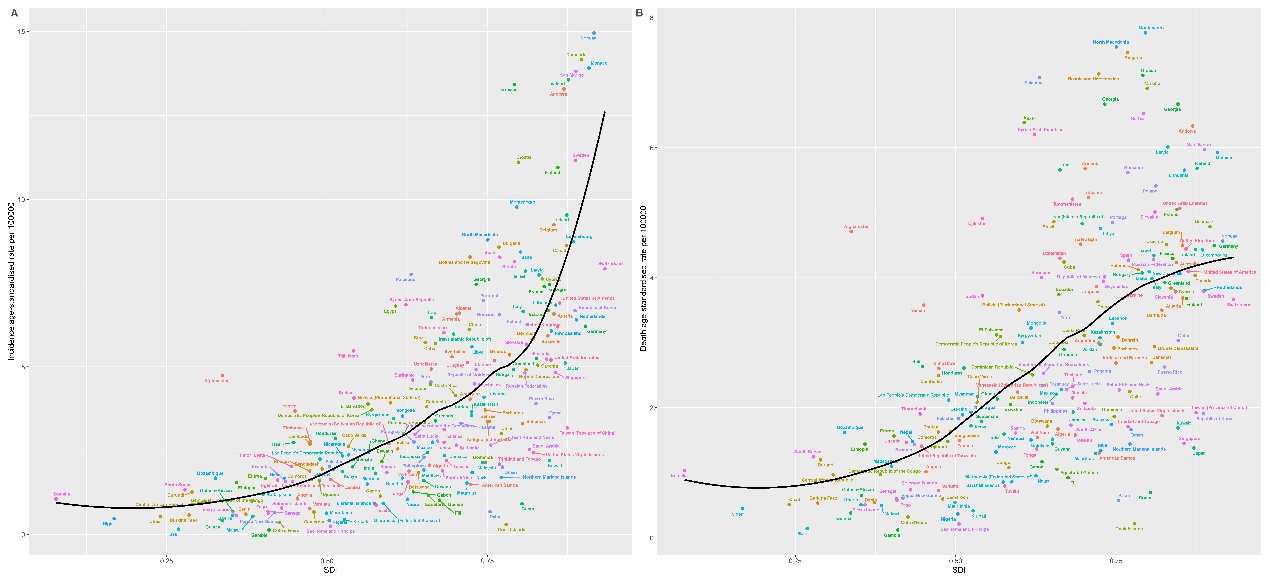


**Supplemental** **Fig. 3**. Incidence (A) and death (B) age-standardized rate for brain and central nervous system cancer of 204 countries and territories in 2021 according to the sociodemographic index.


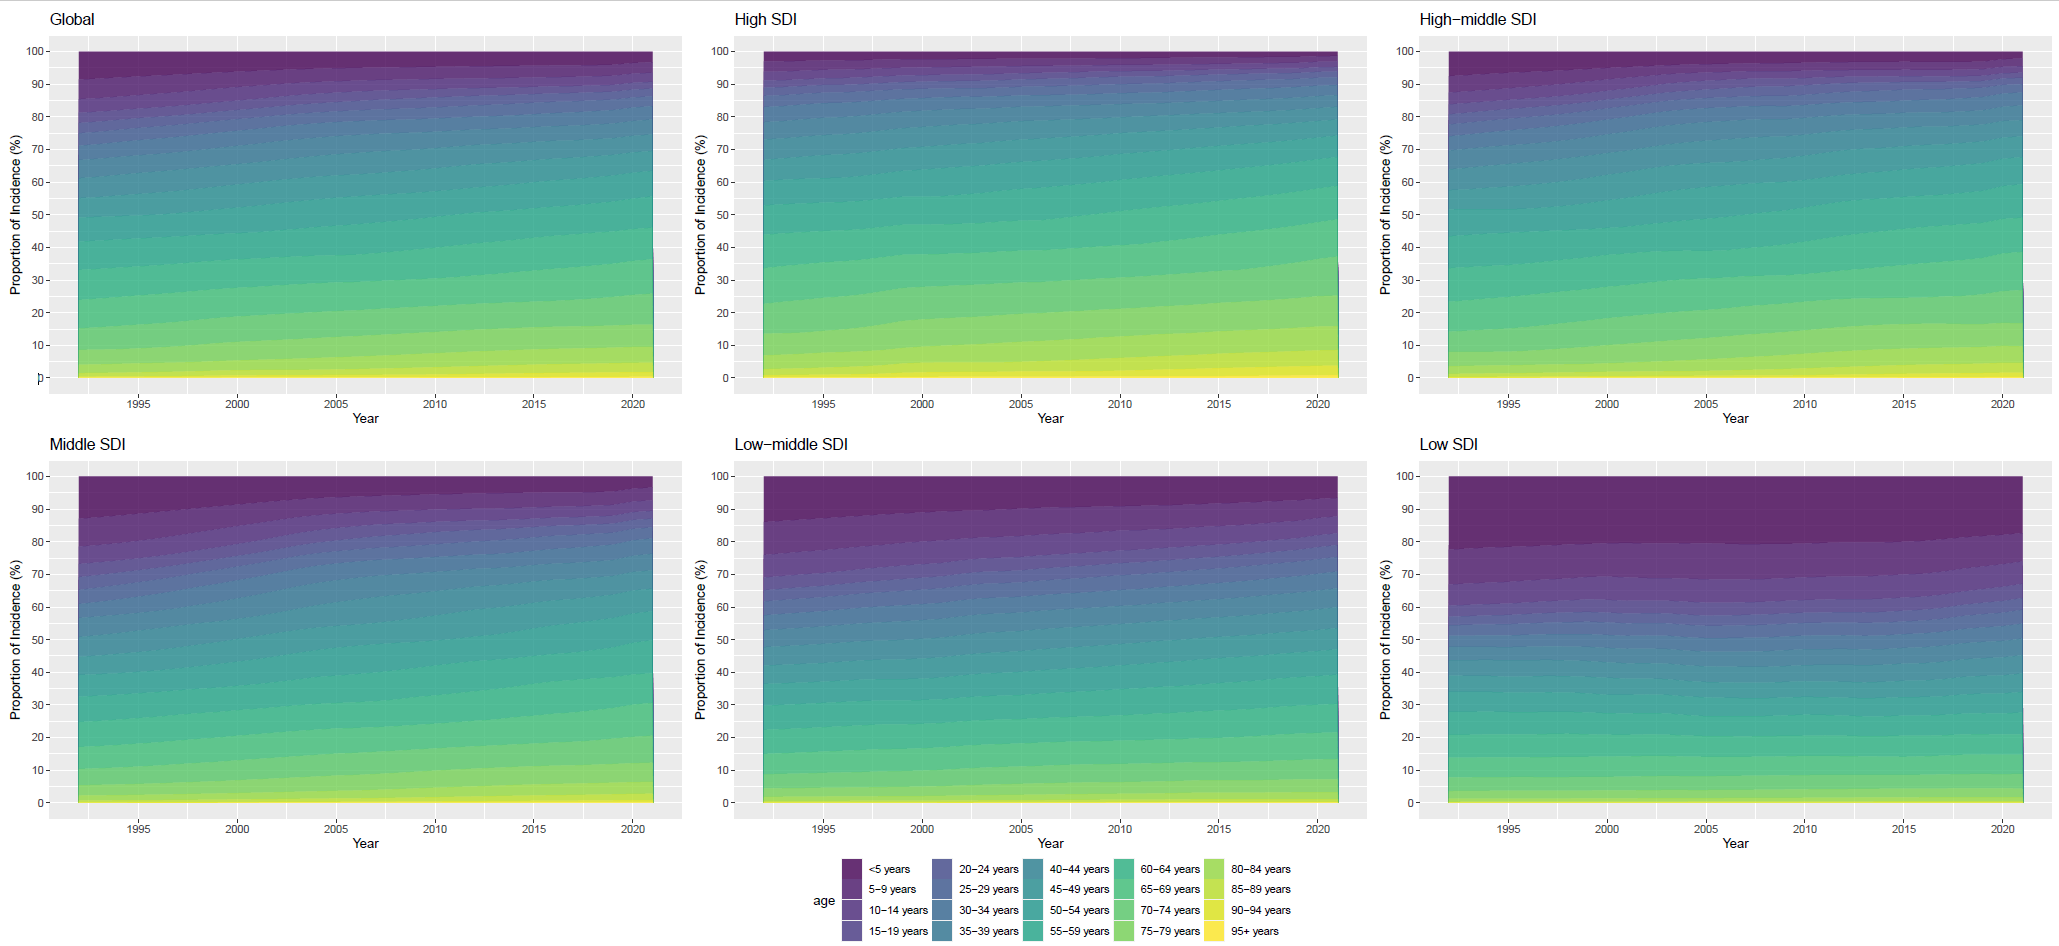
 **Supplemental** **Fig. 4**. Incidence cases proportion for brain and central nervous system cancer across all ages groups globally and among different sociodemographic index regions.


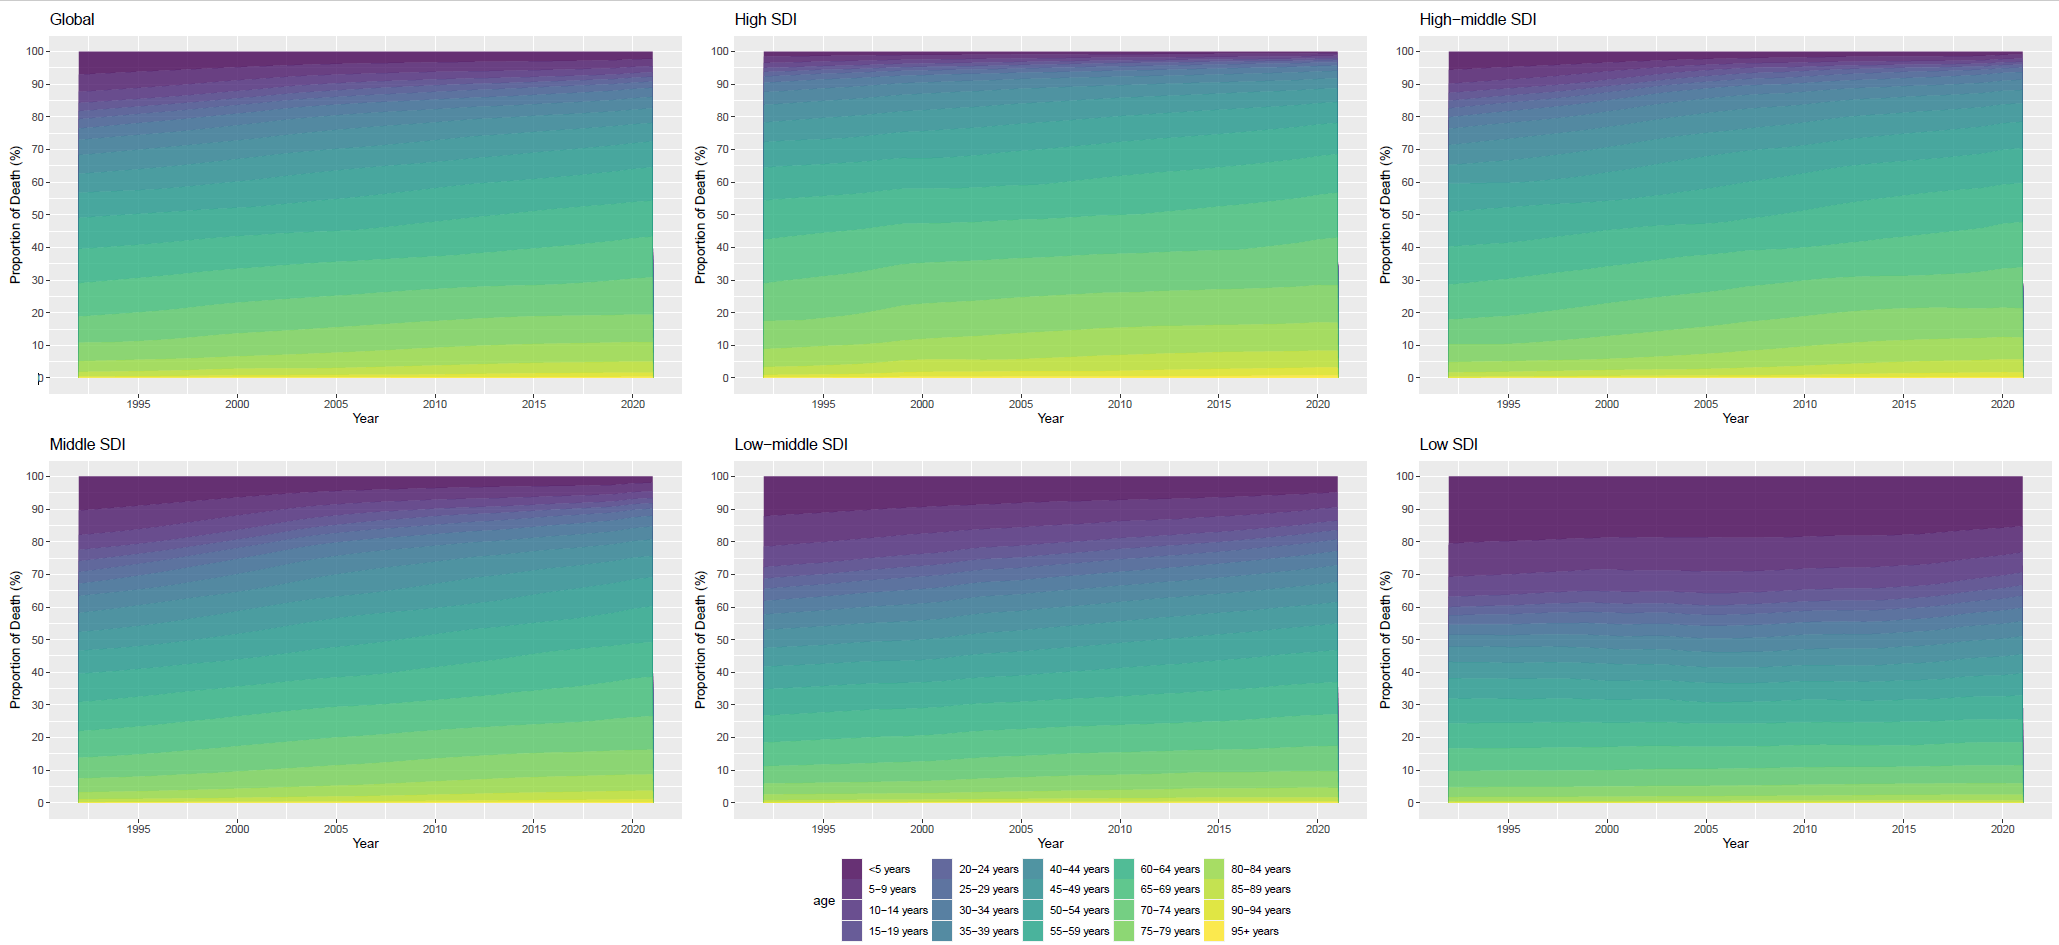
 **Supplemental** **Fig. 5**. Death cases proportion for brain and central nervous system cancer across all ages groups globally and among different sociodemographic index regions.
